# Supplementary material for: Electrochemistry of Tetrathiafulvalene Ligands Assembled on the Surface of Gold Nanoparticles
Source: MDPI journal article supplement (doi:10.3390/molecules27217639), 2022-11-07
Supplement: s1 [file s1]

# Electrochemistry of Tetrathiafulvalene Ligands Assembled on the Surface of Gold Nanoparticles

<sup>1</sup> Institute of Organic Chemistry and Biochemistry of the Czech Academy of Sciences,  
Flemingovo nám. 542/2, 160 00 Prague, Czech Republic

<sup>2</sup> J. Heyrovský Institute of Physical Chemistry of the Czech Academy of Sciences, Dolejškova  
2155/3, 182 23 Prague, Czech Republic

\* Correspondence: [lubomir.pospisil@jh-inst.cas.cz](mailto:lubomir.pospisil@jh-inst.cas.cz) (L.P.); [ivo.stary@uochb.cas.cz](mailto:ivo.stary@uochb.cas.cz) (I.S.)

$^1\text{H}$  and  $^{13}\text{C}$  NMR spectra of compounds **3**, **4**, **5** and **1**

### Compound **3**

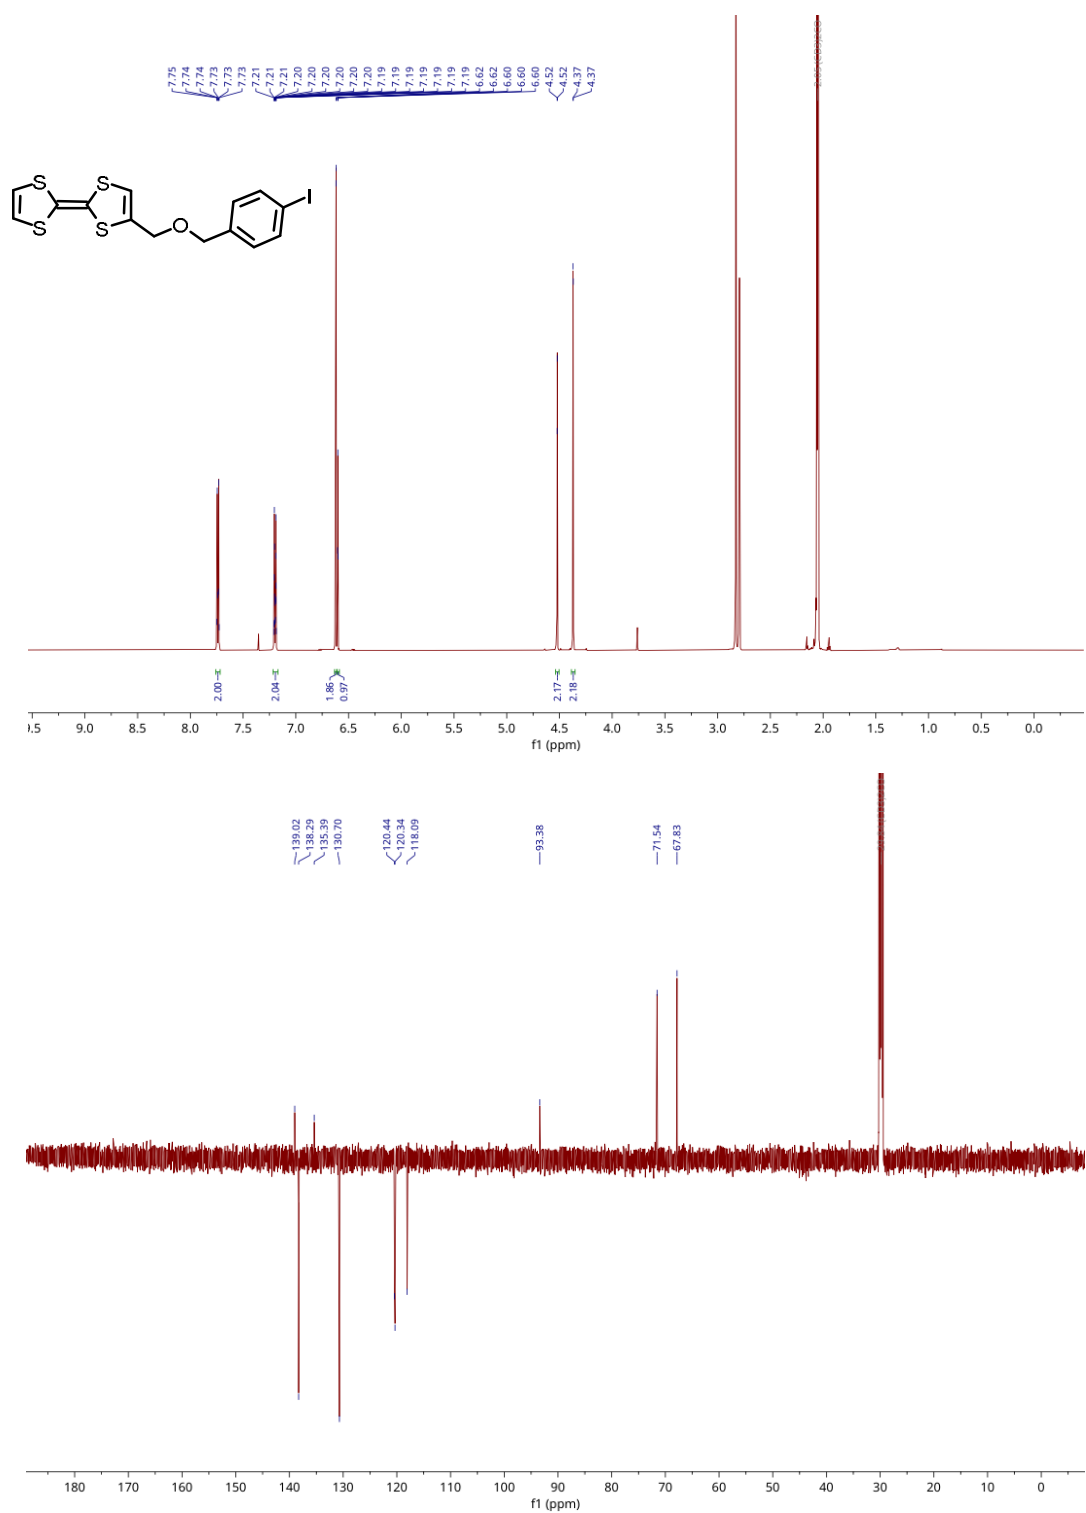

# Compound 4

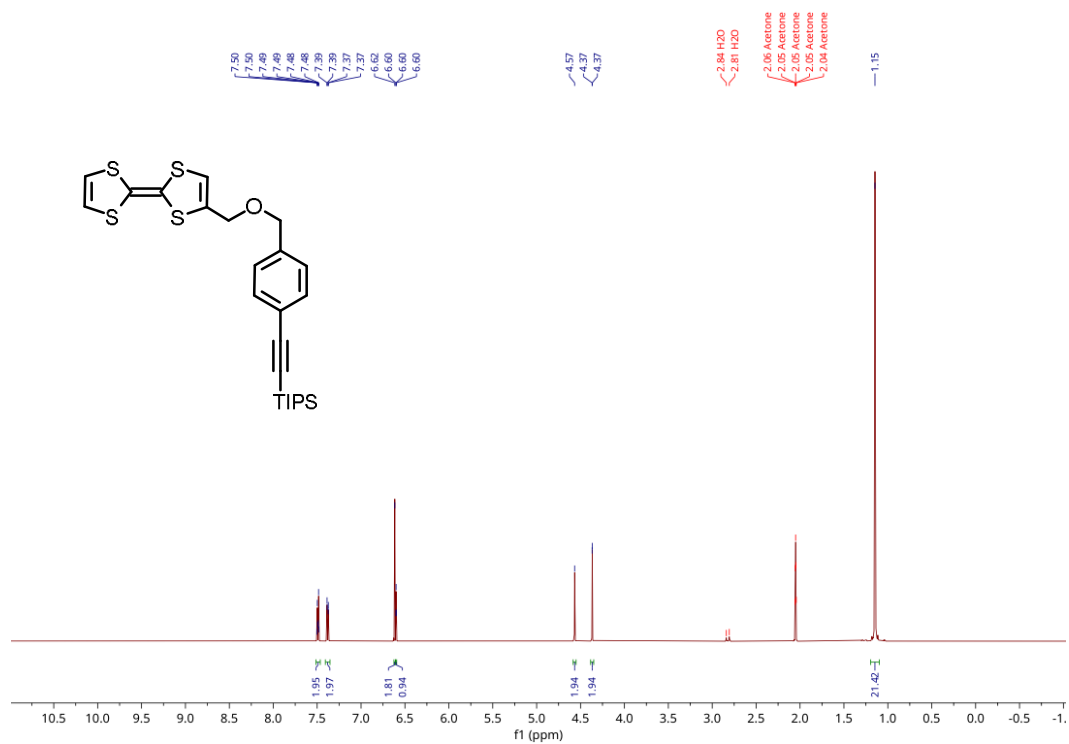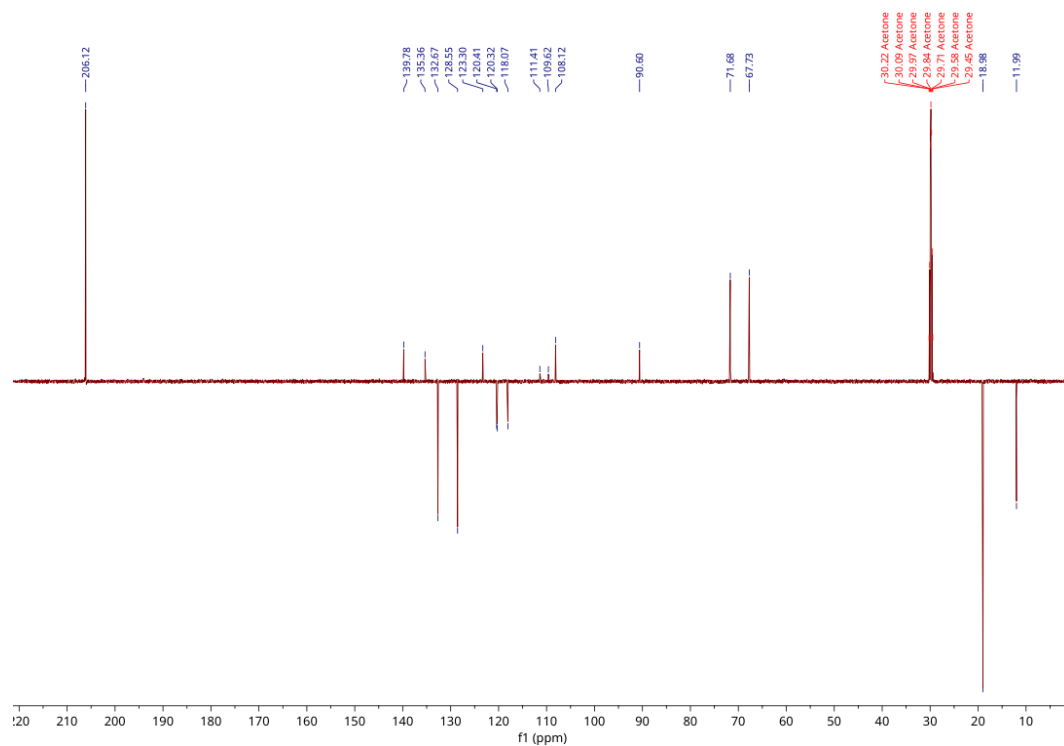

# Compound 5

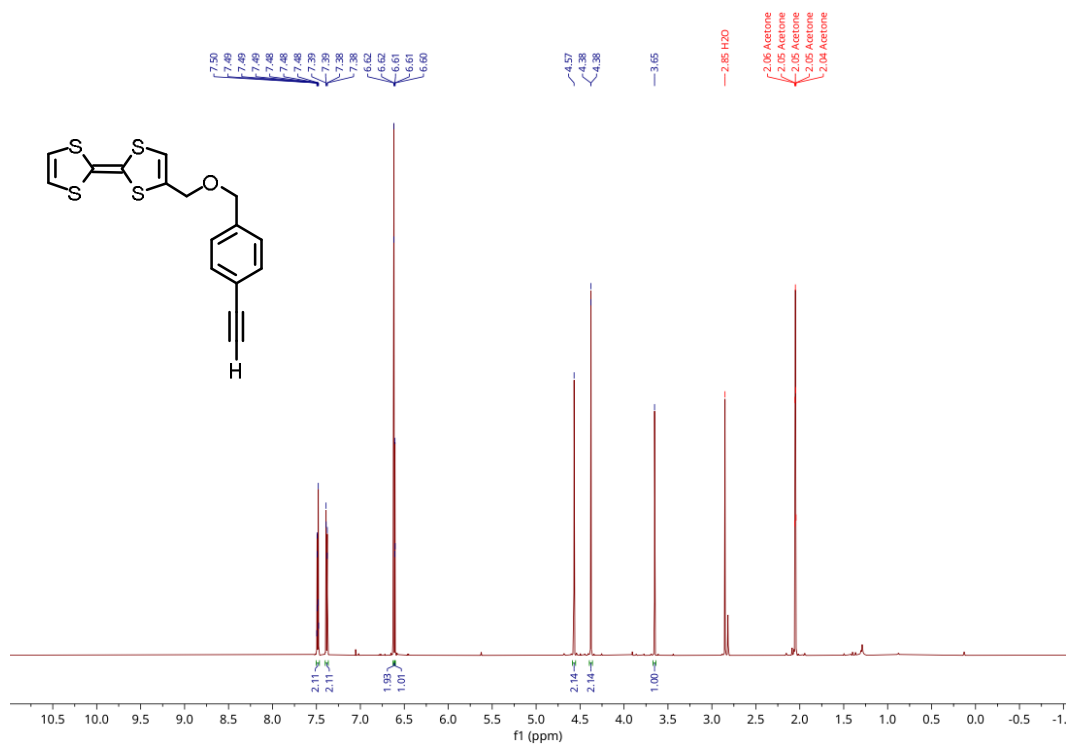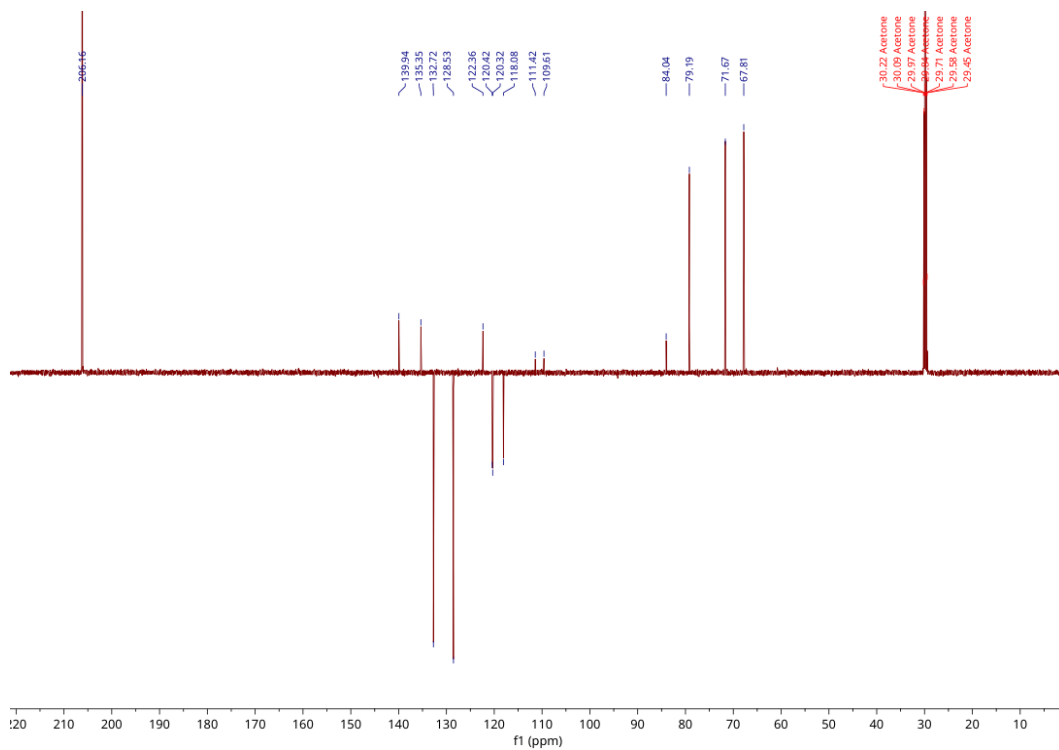

### Compound 1

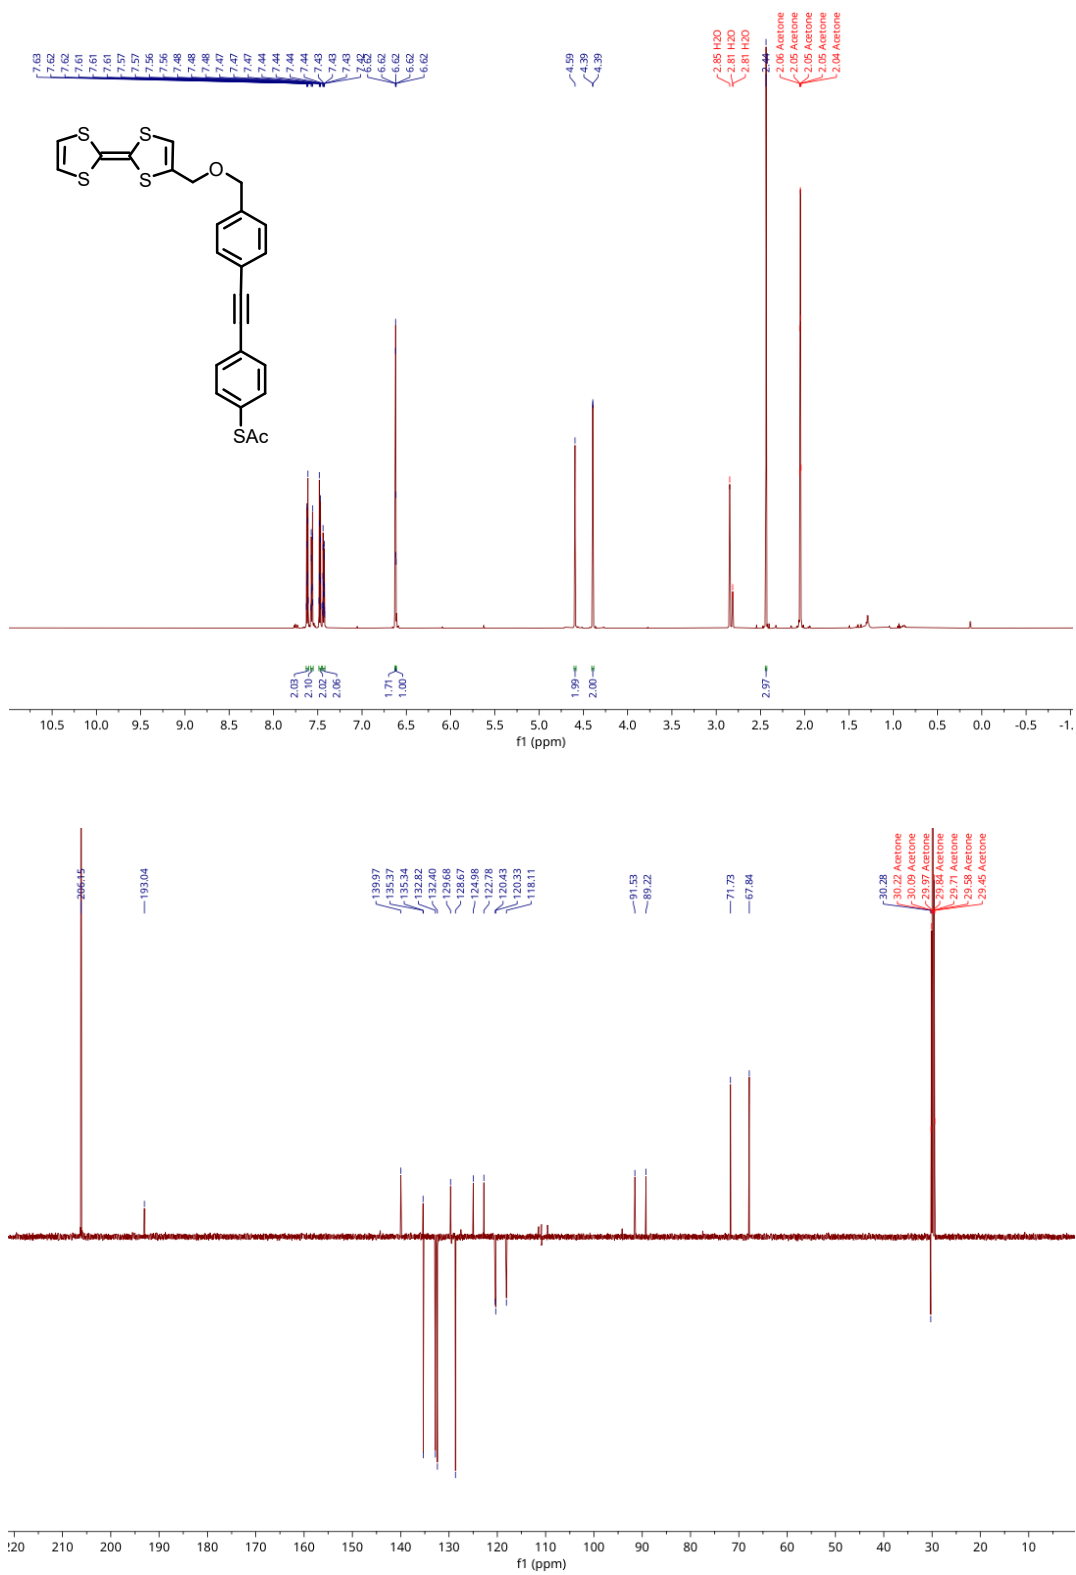

**Figure S1** Identification compounds by spectroscopy.

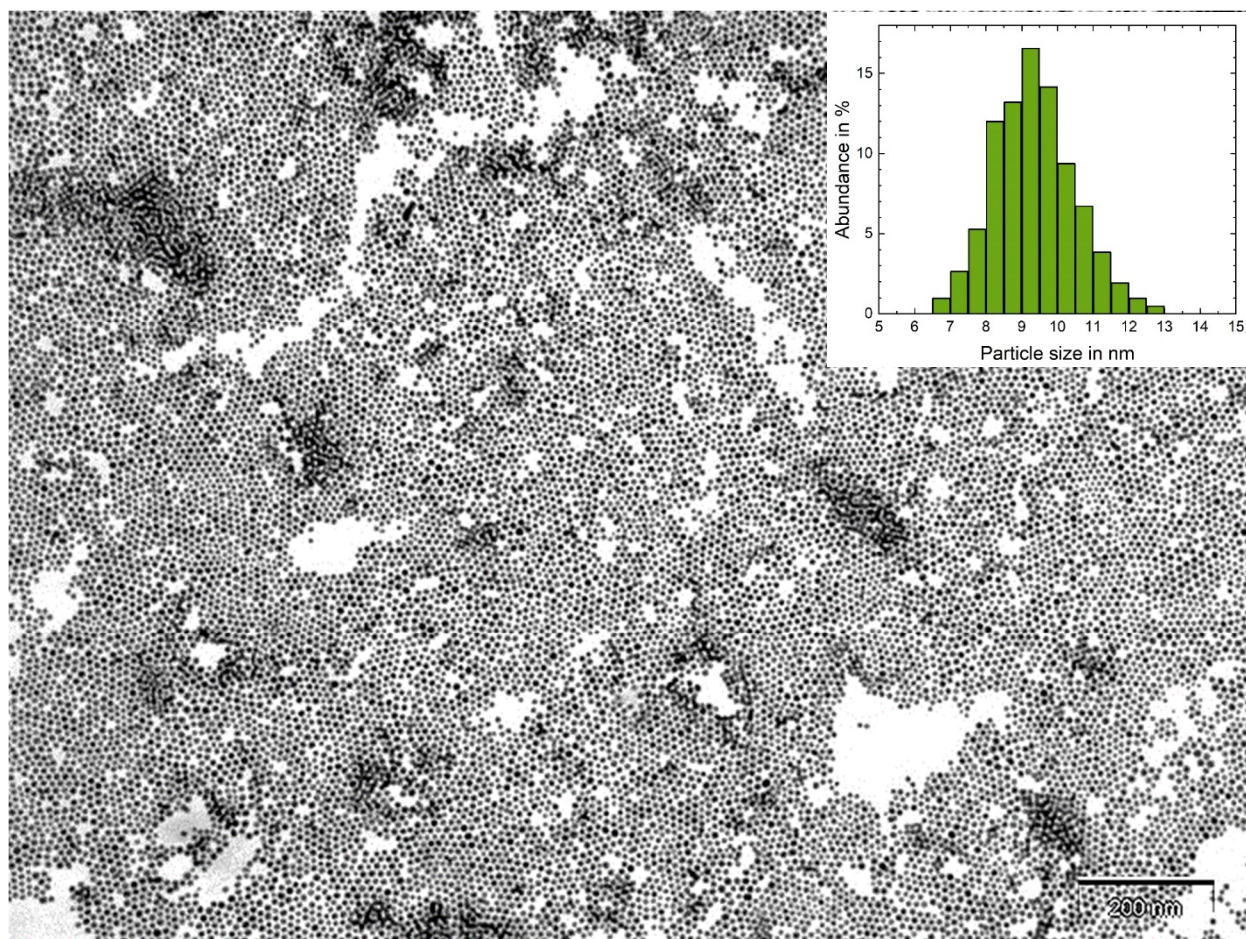

**Figure S2:** TEM image (magnification 75 000x) with size-distribution histogram (inset) of  $C_{12}H_{23}S@AuNP$ .

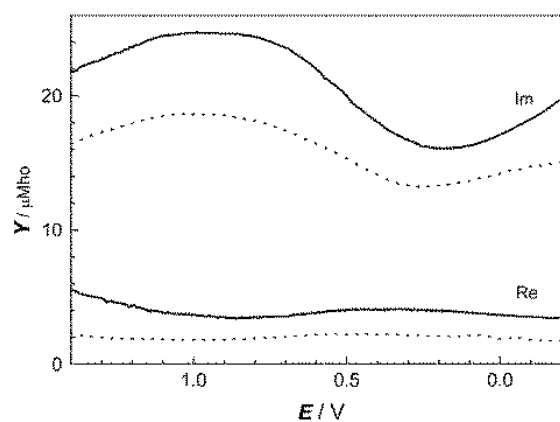

**Figure S3:** The phase-sensitive AC voltammogram of  $C_{12}H_{23}S@AuNP$  (1.6 Hz, dichloroethane, TBAPF<sub>6</sub>) showing the absence of any faradaic process.
